# Supplementary material for: Photo-driven anti-Markovnikov alkyne hydration in self-assembled hollow complexes
Source: Royal Society of Chemistry journal article supplement (doi:10.1039/c1cc14523a), 2011-01-01
Supplement: c1cc14523a.pdf [file c1cc14523a.pdf]

## Supplementary Information

### Photo-driven anti-Markovnikov alkyne hydration in self-assembled hollow complexes

Takashi Murase, Hiroki Takezawa and Makoto Fujita\*

Department of Applied Chemistry, School of Engineering, The University of Tokyo, CREST,  
Japan Science and Technology Agency (JST), 7-3-1 Hongo, Bunkyo-ku, Tokyo 113-8656,  
Japan.

e-mail: mfujita@appchem.t.u-tokyo.ac.jp

#### Contents.

- Materials and Instrumentations.
- General procedure for photo-hydration of alkynes within cage **1**.
- Photo-hydration of 1-phenyl-1-hexyne (**2**) within cage **1a**:
  - physical data.
  - GC-MS spectrum of **3** extracted from cage **1a** (Fig. S1).
  - <sup>1</sup>H NMR spectrum of the precipitated by-products (Fig. S2).
- Photo-hydration of 1-phenyl-1-pentyne (**6a**), 1-phenyl-1-butyne (**6b**) and 1-phenyl-1-propyne (**6c**) within cage **1a**:
  - physical data.
- Photochemical reactions of benzyl ketone **3** (without cage **1a**):
  - <sup>1</sup>H NMR spectra of **3** and the photoproducts (Fig. S3).
- Photochemical reactions of **3** within cage **1a**:
  - physical data.
  - <sup>1</sup>H NMR spectra of **1a**•(**3**)<sub>2</sub> before and after photoirradiation (Fig. S4).
- Photo-hydration of **2** within cage **1b**:
  - physical data.
  - <sup>1</sup>H NMR spectrum of **1b**•**2** (Fig. S5).
  - <sup>1</sup>H NMR spectrum of **3** extracted from cage **1b** (Fig. S6).
- Photo-hydration of 1-(4-cyanophenyl)-1-hexyne (**4a**) within cage **1b**:
  - physical data.
- Photo-hydration of 1-(4-acetylphenyl)-1-hexyne (**4b**) within cage **1b**:
  - physical data.

**Materials and Instrumentations:**  $^1\text{H}$  NMR spectra were recorded on a Bruker DRX-500 (500 MHz) or a Bruker Avance 500 equipped with CP-TCI cryoprobe at 300 K. TMS or  $\text{CHCl}_2\text{CHCl}_2$  ( $\text{CDCl}_3$  solution) in a capillary served as an external standard ( $\delta = 0$  ppm for TMS or  $\delta = 5.90$  ppm for  $\text{CHCl}_2\text{CHCl}_2$ ). GC-MS spectra were obtained on an Agilent 5973 inert Mass selective Detector equipped with a 6890N Network GC system and an EI source. Photoirradiation was carried out with a SEN LIGHTS CORP. HL400JH-3 400W high-pressure mercury lamp. Solvents and reagents were purchased from TCI Co., Ltd., WAKO Pure Chemical Industries Ltd., and Sigma-Aldrich Co. Deuterated  $\text{H}_2\text{O}$  was acquired from Cambridge Isotope Laboratories, Inc. and used as supplied for the complexation reactions and NMR measurements.

**General procedure for photo-hydration of alkynes within cage 1:** Arylalkynes (0.80 mmol) was suspended in a water solution (2.0 mL) of cage **1** ( $4.0 \times 10^{-2}$  mmol; 20 mM) and the solution was stirred for 1 h at room temperature. After removing excess substrates by filtration, the formation of the host-guest complex was confirmed by  $^1\text{H}$  NMR. The solution was degassed by freeze-pump-thaw method and filled with Ar, then irradiated with high-pressure mercury lamp (400 W) for 6 h at room temperature. After extraction with  $\text{CDCl}_3$ , the yields were determined by  $^1\text{H}$  NMR analysis of the crude mixture. *The product structures were identified by  $^1\text{H}$  NMR, GC-MS and comparison with authentic samples.*

### Photo-hydration of 1-phenyl-1-hexyne (**2**) within cage **1a**.

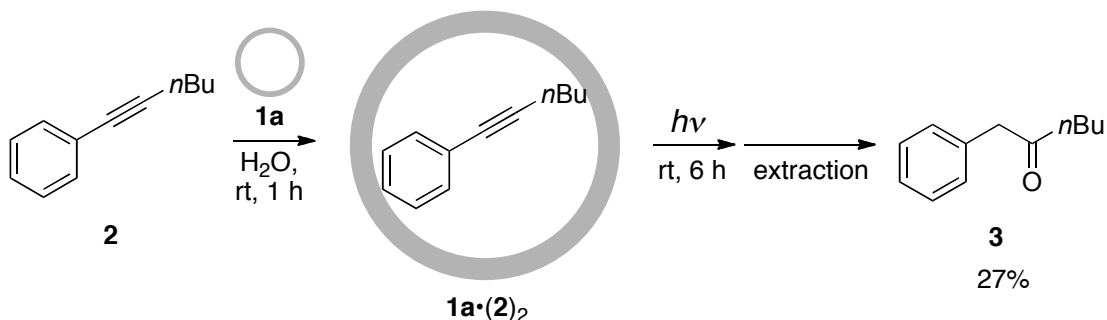

**Physical data of 1a·(2)<sub>2</sub>**: <sup>1</sup>H NMR (500 MHz, D<sub>2</sub>O, 300 K):  $d = -0.98$  (t,  $J = 7.5$  Hz, 3H, **2**), 0.22 (sextet,  $J = 7.0$  Hz, 2H, CH<sub>2</sub>, **2**), 0.37 (quintet,  $J = 6.0$  Hz, 2H, CH<sub>2</sub>, **2**), 1.21 (t,  $J = 6.0$  Hz, 2H, CH<sub>2</sub>, **2**), 2.84 (s, 72H, CH<sub>3</sub>, **1a**), 3.22 (s, 24H, CH<sub>2</sub>, **1a**), 5.37 (d,  $J = 7.5$  Hz, 2H, CH, **2**), 6.03 (t,  $J = 7.0$  Hz, 2H, CH, **2**), 6.95 (t,  $J = 7.0$  Hz, 1H, CH, **2**), 8.81 (d,  $J = 6.0$  Hz, 24H, PyH<sub>a</sub>, **1a**), 9.41 (d,  $J = 6.0$  Hz, 24H, PyH<sub>b</sub>, **1a**).

**Physical data of 3**: <sup>1</sup>H NMR (500 MHz, CDCl<sub>3</sub>, 300 K):  $d = 0.86$  (t,  $J = 7.5$  Hz, 3H, CH<sub>3</sub>), 1.26 (sextet,  $J = 7.5$  Hz, 2H, CH<sub>2</sub>), 1.53 (quintet,  $J = 8.0$  Hz, 2H, CH<sub>2</sub>), 2.44 (t,  $J = 7.5$  Hz, 2H, CH<sub>2</sub>), 3.68 (s, 2H, CH<sub>2</sub>), 7.20 (d,  $J = 7.0$  Hz, 2H, CH), 7.26 (br, 1H, CH), 7.33 (t,  $J = 7.5$  Hz, 2H, CH).  
MS (EI)  $m/z$ : 176 [M]<sup>+</sup>, 91 [M-C<sub>4</sub>H<sub>9</sub>CO]<sup>+</sup>, 85 [M-C<sub>6</sub>H<sub>5</sub>CH<sub>2</sub>]<sup>+</sup>.

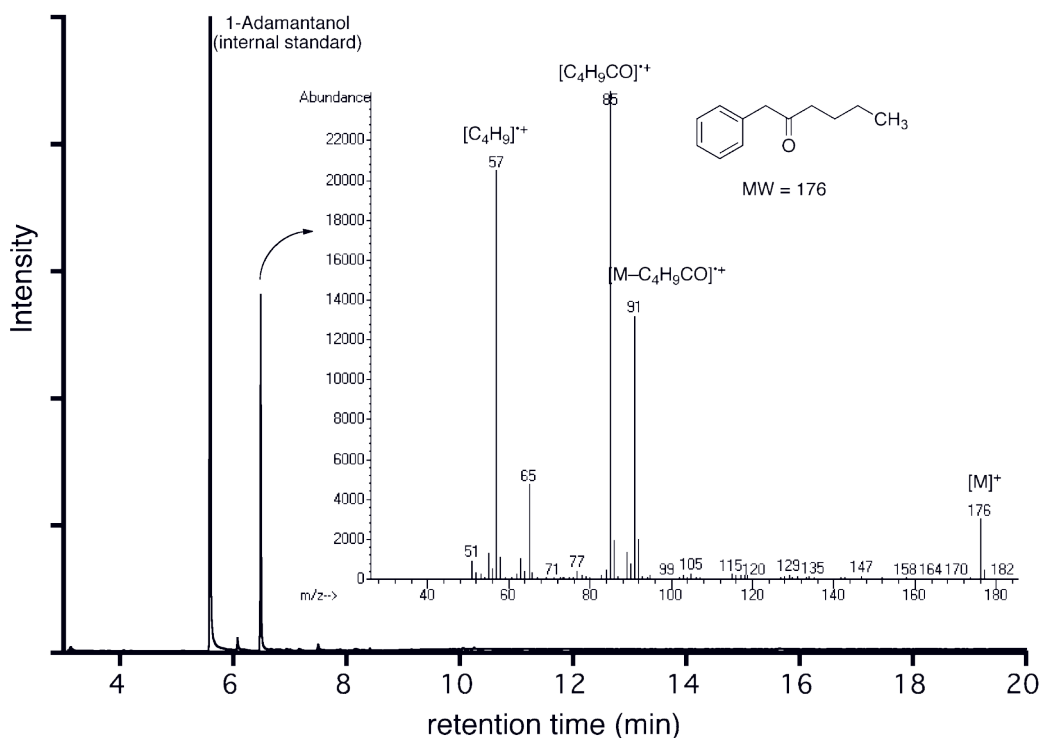

**Fig. S1.** GC and EI-MS spectra of **3** extracted from the reaction mixture (1-adamantanol: internal standard for GC-MS analysis).

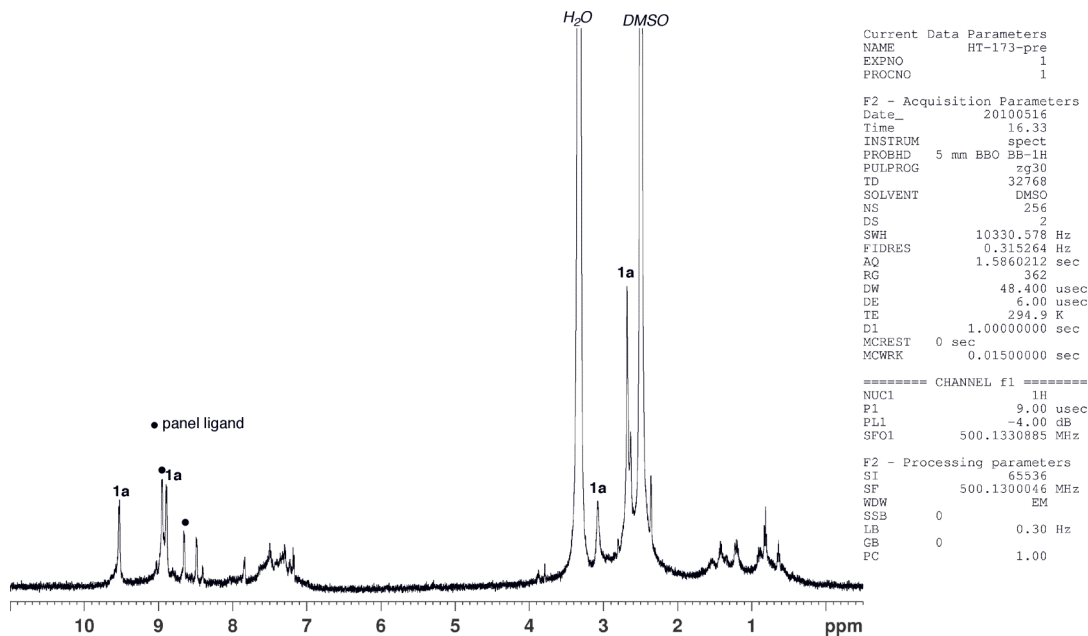

**Fig. S2.**  $^1\text{H}$  NMR spectrum of the precipitated by-products after UV-light irradiation to inclusion complex  $1\mathbf{a}\cdot(2)_2$ . The precipitate was redissolved in  $\text{DMSO-}d_6$ . The broad signals could not be identified, but the Markovnikov adduct was not contained in the spectrum. Panel ligand of cage  $1\mathbf{a}$ : 2,4,6-tri(4-pyridyl)-1,3,5-triazine.

### Photo-hydration of 1-phenyl-1-pentyne ( $6\mathbf{a}$ ) within cage $1\mathbf{a}$ .

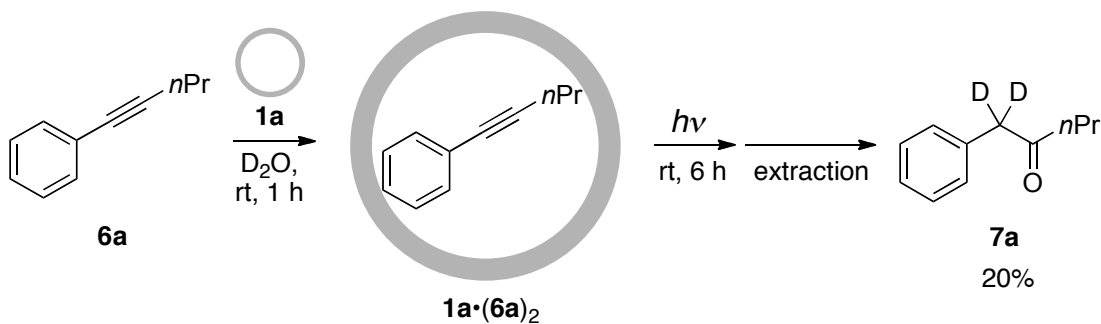

**Physical data of  $1\mathbf{a}\cdot(6\mathbf{a})_2$ :**  $^1\text{H}$  NMR (500 MHz,  $\text{D}_2\text{O}$ , 300 K):  $\delta$  = -0.56 (t,  $J$  = 8.0 Hz, 3H,  $6\mathbf{a}$ ), 0.44 (br, 2H,  $\text{CH}_2$ ,  $6\mathbf{a}$ ), 1.22 (br, 2H,  $\text{CH}_2$ ,  $6\mathbf{a}$ ), 2.81 (s, 72H,  $\text{CH}_3$ ,  $1\mathbf{a}$ ), 3.19 (s, 24H,  $\text{CH}_2$ ,  $1\mathbf{a}$ ), 5.12 (d,  $J$  = 7.0 Hz, 2H,  $\text{CH}$ ,  $6\mathbf{a}$ ), 5.84 (t,  $J$  = 7.0 Hz, 2H,  $\text{CH}$ ,  $6\mathbf{a}$ ), 6.66 (br, 1H,  $\text{CH}$ ,  $6\mathbf{a}$ ), 8.76 (d,  $J$  = 4.5 Hz, 24H,  $\text{PyH}_a$ ,  $1\mathbf{a}$ ), 9.36 (d,  $J$  = 4.0 Hz, 24H,  $\text{PyH}_b$ ,  $1\mathbf{a}$ ).

**Physical data of  $7\mathbf{a}$ :**  $^1\text{H}$  NMR (500 MHz,  $\text{CDCl}_3$ , 300 K):  $\delta$  = 0.86 (t,  $J$  = 7.5 Hz, 3H,  $\text{CH}_3$ ), 1.57 (sextet,  $J$  = 7.0 Hz, 2H,  $\text{CH}_2$ ), 2.42 (t,  $J$  = 7.5 Hz, 2H,  $\text{CH}_2$ ), 7.21 (d,  $J$  = 7.0 Hz, 2H,  $\text{CH}$ ), 7.26 (br, 1H,  $\text{CH}$ ), 7.33 (t,  $J$  = 7.5 Hz, 2H,  $\text{CH}$ ). MS (EI)  $m/z$ : 164  $[\text{M}]^+$ , 93  $[\text{M}-\text{C}_3\text{H}_7\text{CO}]^+$ , 71  $[\text{M}-\text{C}_6\text{H}_5\text{CD}_2]^+$ .

### Photo-hydration of 1-phenyl-1-butyne (**6b**) within cage **1a**.

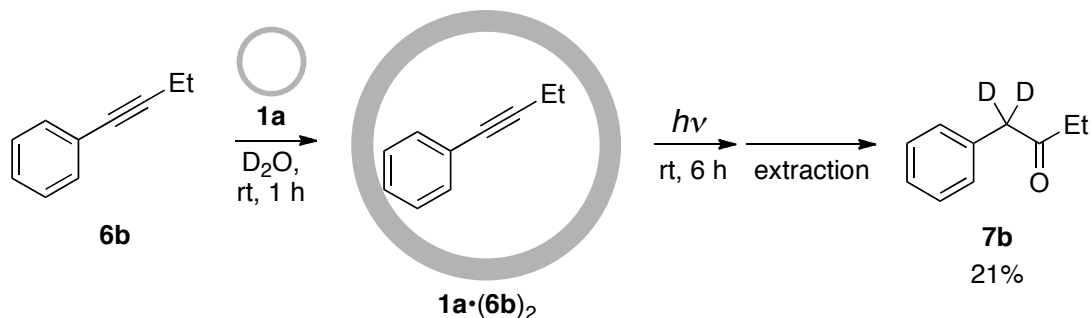

**Physical data of 1a·(6b)<sub>2</sub>**: <sup>1</sup>H NMR (500 MHz, D<sub>2</sub>O, 300 K): *d* = -0.22 (t, *J* = 7.5 Hz, 3H, **6b**), 1.09 (q, *J* = 7.5 Hz, 2H, CH<sub>2</sub>, **6b**), 2.76 (s, 72H, CH<sub>3</sub>, **1a**), 3.16 (s, 24H, CH<sub>2</sub>, **1a**), 5.06 (d, *J* = 7.5 Hz, 2H, CH, **6b**), 5.84 (t, *J* = 7.5 Hz, 2H, CH, **6b**), 6.18 (t, *J* = 7.5 Hz, 1H, CH, **6b**), 8.73 (d, *J* = 5.5 Hz, 24H, PyH<sub>a</sub>, **1a**), 9.35 (d, *J* = 5.0 Hz, 24H, PyH<sub>b</sub>, **1a**).

**Physical data of 7b**: <sup>1</sup>H NMR (500 MHz, CDCl<sub>3</sub>, 300 K): *d* = 1.02 (t, *J* = 7.5 Hz, 3H, CH<sub>3</sub>), 2.47 (quartet, *J* = 7.5 Hz, 2H, CH<sub>2</sub>), 2.42 (t, *J* = 7.5 Hz, 2H, CH<sub>2</sub>), 7.21 (d, *J* = 7.5 Hz, 2H, CH), 7.26 (br, 1H, CH), 7.33 (t, *J* = 7.0 Hz, 2H, CH). MS (EI) *m/z*: 159 [M]<sup>+</sup>, 93 [M-CH<sub>3</sub>CO]<sup>+</sup>, 57 [M-C<sub>6</sub>H<sub>5</sub>CD<sub>2</sub>]<sup>+</sup>.

### Photo-hydration of 1-phenyl-1-pentyne (**6c**) within cage **1a**.

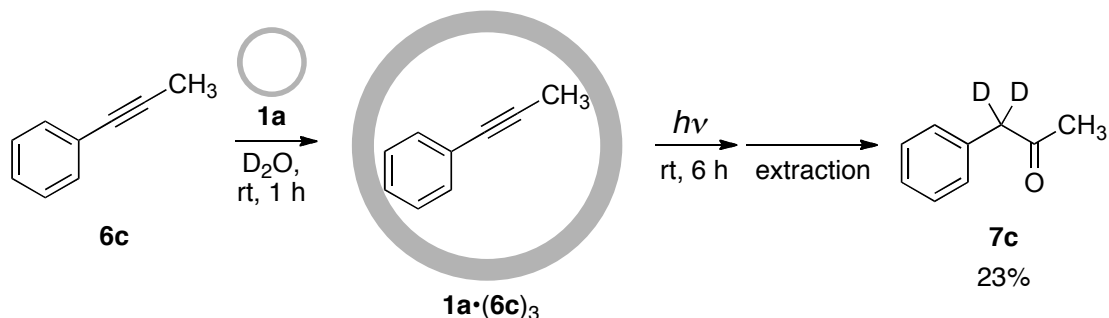

**Physical data of 1a·(6c)<sub>3</sub>**: <sup>1</sup>H NMR (500 MHz, D<sub>2</sub>O, 300 K): *d* = 1.05 (s, 3H, CH<sub>3</sub>, **6c**), 2.81 (s, 72H, CH<sub>3</sub>, **1a**), 3.20 (s, 24H, CH<sub>2</sub>, **1a**), 5.18 (d, *J* = 8.0 Hz, 2H, CH, **6c**), 5.67 (t, *J* = 7.5 Hz, 2H, CH, **6c**), 5.84 (t, *J* = 7.5 Hz, 1H, CH, **6c**), 8.75 (d, *J* = 4.0 Hz, 24H, PyH<sub>a</sub>, **1a**), 9.41 (d, *J* = 4.0 Hz, 24H, PyH<sub>b</sub>, **1a**).

**Physical data of 7c**: <sup>1</sup>H NMR (500 MHz, CDCl<sub>3</sub>, 300 K): *d* = 2.15 (s, 3H, CH<sub>3</sub>), 7.21 (d, *J* = 7.5 Hz, 2H, CH), 7.26 (br, 1H, CH), 7.34 (t, *J* = 7.0 Hz, 2H, CH). MS (EI) *m/z*: 136 [M]<sup>+</sup>, 93 [M-CH<sub>3</sub>CO]<sup>+</sup>.

### Photochemical reactions of benzyl ketone **3** (without cage **1a**).

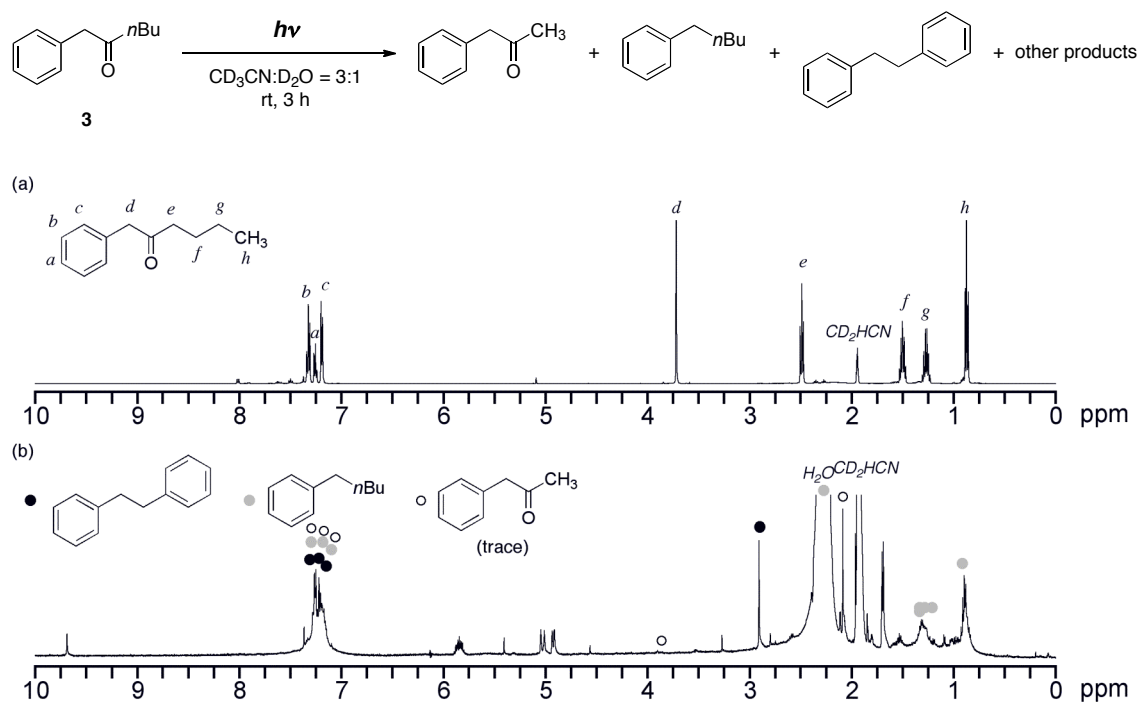

**Fig. S3.** <sup>1</sup>H NMR spectra (CD<sub>3</sub>CN) of (a) benzyl ketone **3** and (b) the photoproducts. The photoproducts were identified by NMR and GC-MS.

### Photochemical reactions of benzyl ketone **3** within cage **1a**.

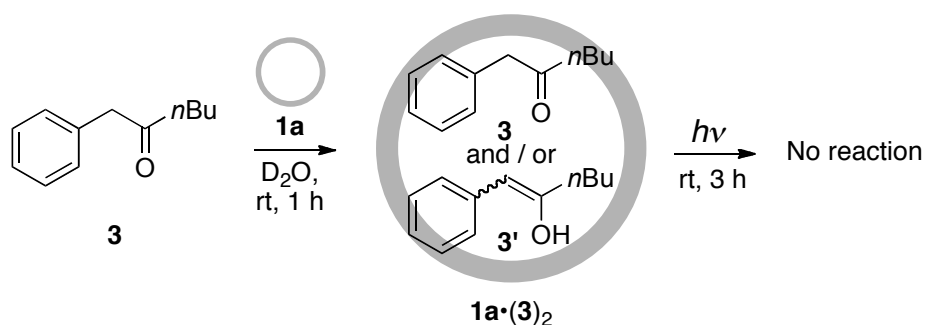

**Physical data of 1a•(3)<sub>2</sub>:** <sup>1</sup>H NMR (500 MHz, D<sub>2</sub>O, 300 K): *d* = -1.13 (sextet, *J* = 6.5 Hz, 2H, CH<sub>2</sub>, **3**), -0.91 (t, *J* = 6.5 Hz, 3H, CH<sub>3</sub>, **3**), -0.73 (quintet, *J* = 6.5 Hz, 2H, CH<sub>2</sub>, **3**), 0.38 (t, *J* = 7.5 Hz, 3H, CH<sub>3</sub>, **3'**), 0.58 (t, *J* = 6.5 Hz, 2H, CH<sub>2</sub>, **3**), 0.89 (sextet, *J* = 7.5 Hz, 2H, CH<sub>2</sub>, **3'**), 1.15 (quintet, *J* = 7.5 Hz, 2H, CH<sub>2</sub>, **3'**), 1.67 (s, 2H, CH<sub>2</sub>, **3**), 2.00 (t, *J* = 7.5 Hz, 2H, CH<sub>2</sub>, **3'**), 2.88 (s, 72H, CH<sub>3</sub>, **1a**), 3.28 (s, 24H, CH<sub>2</sub>, **1a**), 5.25 (d, *J* = 7.0 Hz, 2H, CH, **3**), 5.47 (t, *J* = 7.0 Hz, 2H, CH, **3**), 5.74 (t, *J* = 6.0 Hz, 1H, CH, **3**), 5.96 (t, *J* = 7.5 Hz, 2H, CH, **3'**), 6.18 (t, *J* = 7.0 Hz, 1H, CH, **3'**), 6.26 (d, *J* = 7.5 Hz, 2H, CH, **3'**), 8.87 (d, *J* = 5.0 Hz, 24H, PyH<sub>a</sub>, **1a**), 9.50 (d, *J* = 5.0 Hz, 24H, PyH<sub>b</sub>, **1a**).

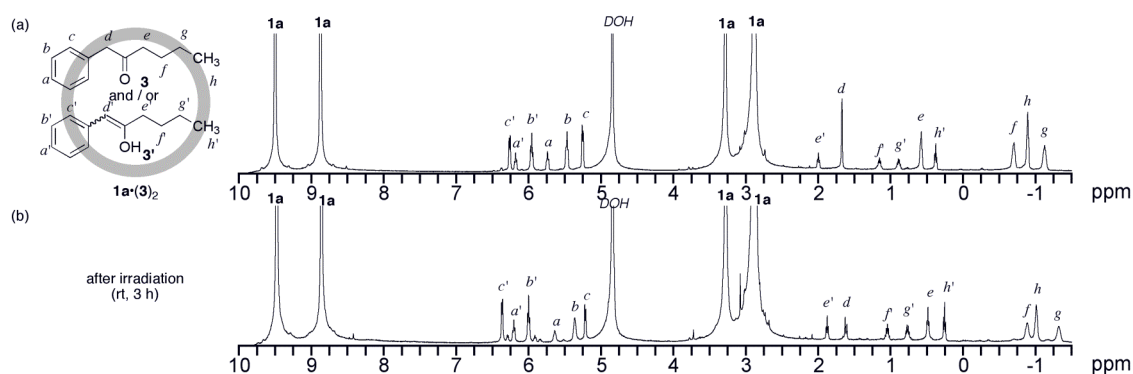

**Fig. S4.**  $^1\text{H}$  NMR spectra ( $\text{D}_2\text{O}$ ) of  $1\mathbf{a}\cdot(\mathbf{3})_2$  (a) before and (b) after photoirradiation. Enol tautomer ( $\mathbf{3}'$ ) of benzyl ketone  $\mathbf{3}$  also existed in cage  $1\mathbf{a}$ . Although the ratio of  $\mathbf{3}$  and  $\mathbf{3}'$  changed and the benzylic protons ( $\text{H}_d$ ) were deuterated during photoirradiation, the total amount of  $\mathbf{3}$  and  $\mathbf{3}'$  remained unchanged.

#### Photo-hydration of $\mathbf{2}$ within cage $1\mathbf{b}$ .

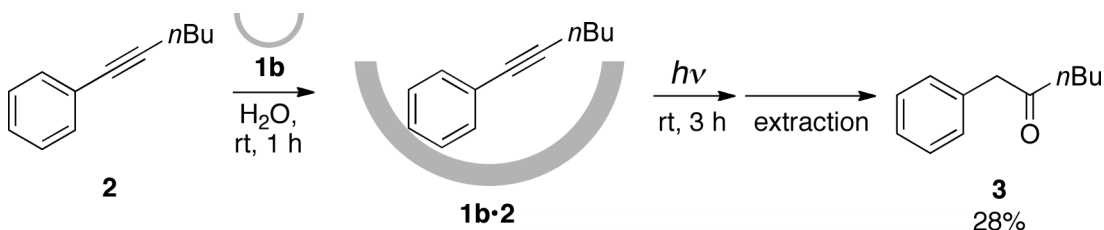

**Physical data of  $1\mathbf{b}\cdot\mathbf{2}$ :**  $^1\text{H}$  NMR (500 MHz,  $\text{D}_2\text{O}$ , 300 K):  $d = -0.20$  (br, 5H,  $\text{CH}_2$  and  $\text{CH}_3$ ,  $\mathbf{2}$ ),  $-0.03$  (br, 2H,  $\text{CH}_2$ ,  $\mathbf{2}$ ),  $0.46$  (br, 2H,  $\text{CH}_2$ ,  $\mathbf{2}$ ),  $2.99\text{--}3.10$  (m, 24H,  $\text{CH}_2$ ,  $\mathbf{1b}$ ),  $5.15$  (br, 2H,  $\text{CH}$ ,  $\mathbf{2}$ ),  $5.42$  (br, 2H,  $\text{CH}$ ,  $\mathbf{2}$ ),  $5.69$  (br, 1H,  $\text{CH}$ ,  $\mathbf{2}$ ),  $7.93$  (t,  $J = 7.0$  Hz, 8H,  $\text{PyH}$ ,  $\mathbf{1b}$ ),  $7.97$  (t,  $J = 7.0$  Hz, 4H,  $\text{PyH}$ ,  $\mathbf{1b}$ ),  $9.05$  (br, 8H,  $\text{PyH}$ ,  $\mathbf{1b}$ ),  $9.16$  (d,  $J = 8.0$  Hz, 4H,  $\text{PyH}$ ,  $\mathbf{1b}$ ),  $9.24$  (d, 4H,  $J = 5.5$  Hz  $\text{PyH}$ ,  $\mathbf{1b}$ ),  $9.33$  (d,  $J = 5.5$  Hz, 8H,  $\text{PyH}$ ,  $\mathbf{1b}$ ),  $9.71$  (s, 4H,  $\text{PyH}$ ,  $\mathbf{1b}$ ),  $10.56$  (s, 8H,  $\text{PyH}$ ,  $\mathbf{1b}$ ).

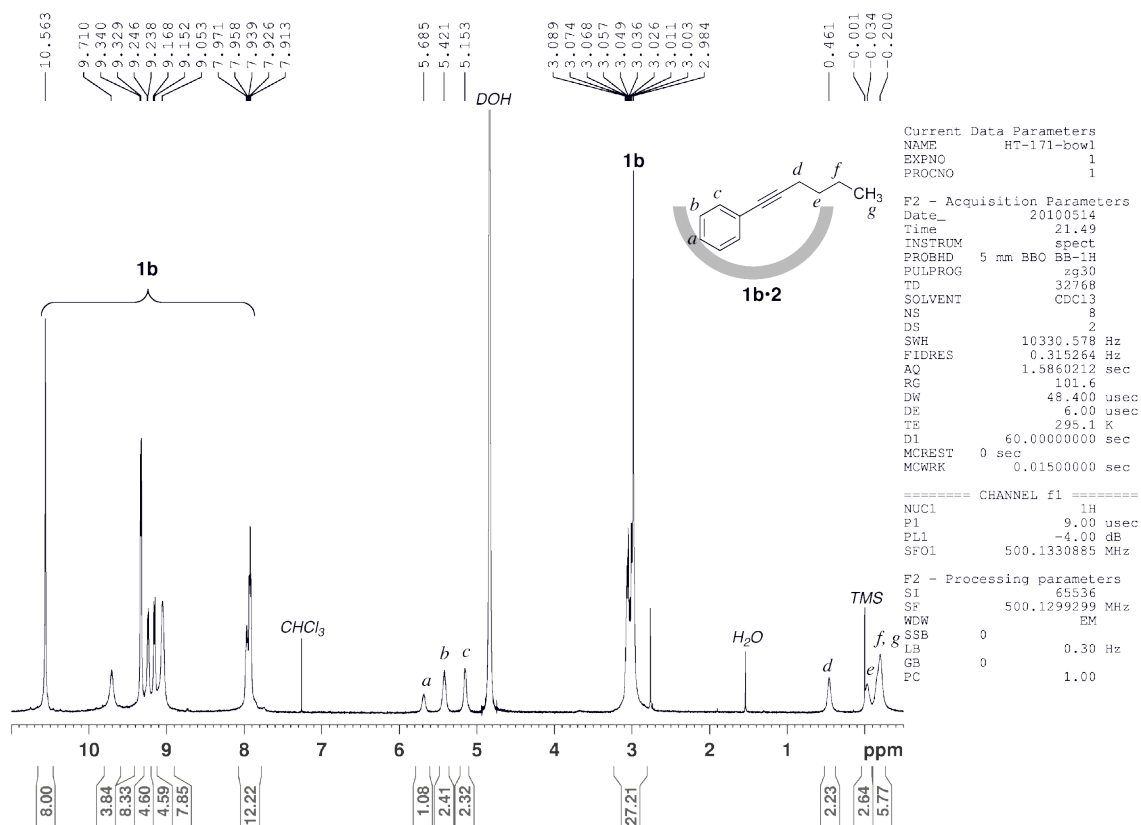

Fig. S5. <sup>1</sup>H NMR spectrum of **1b•2** (D<sub>2</sub>O).

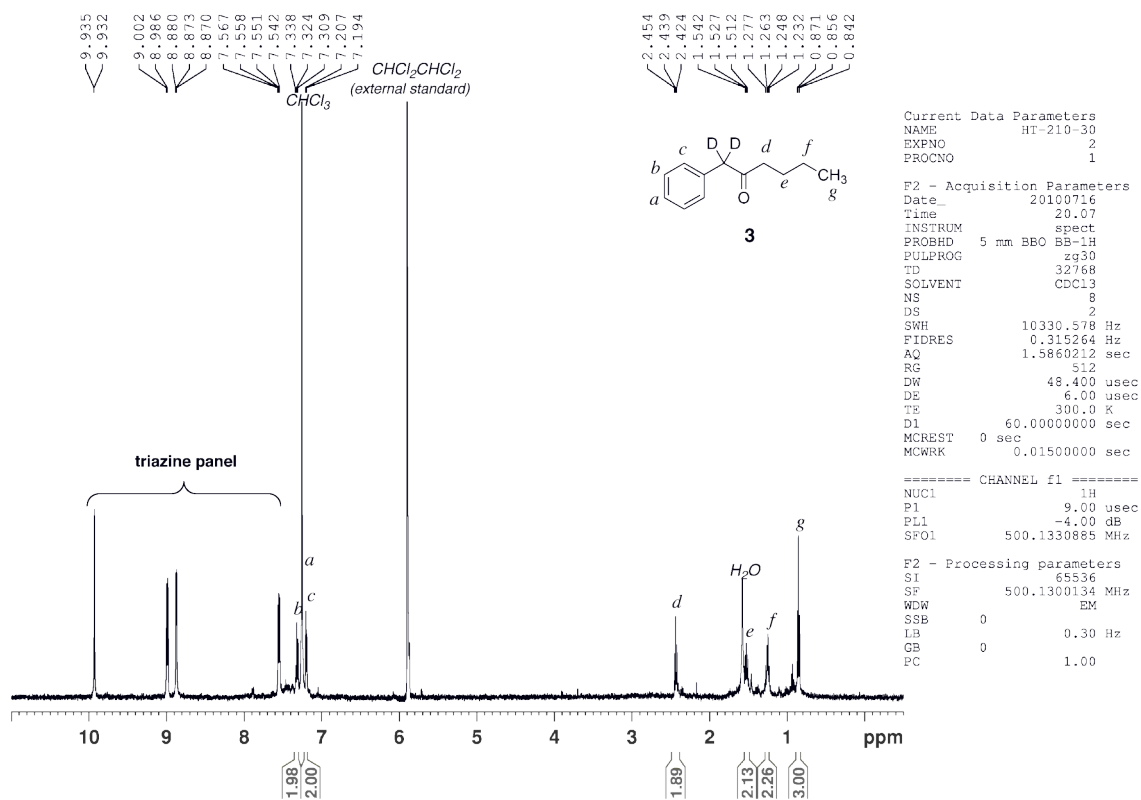

Fig. S6. <sup>1</sup>H NMR spectrum of **3** extracted from cage **1b** with CDCl<sub>3</sub> (reacted in D<sub>2</sub>O solution).



### Photo-hydration of 4a within cage 1b.

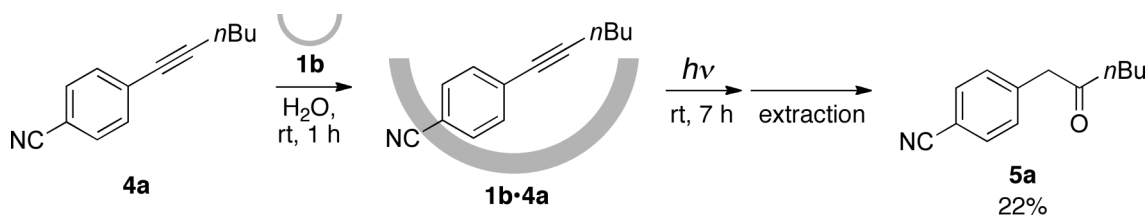

**Physical data of 1b·4a:** <sup>1</sup>H NMR (500 MHz, D<sub>2</sub>O, 300 K): *d* = 0.12 (br, 3H, CH<sub>3</sub>, 4a), 0.31 (br, 2H, CH<sub>2</sub>, 4a), 0.40 (br, 2H, CH<sub>2</sub>, 4a), 1.06 (br, 2H, CH<sub>2</sub>, 4a), 2.99–3.10 (m, 24H, CH<sub>2</sub>, 1b), 5.40 (br, 2H, CH, 4a), 5.87 (br, 2H, CH, 4a), 7.99 (t, *J* = 7.0 Hz, 8H, PyH, 1b), 8.04 (t, *J* = 7.0 Hz, 4H, PyH, 1b), 9.11 (d, *J* = 6.0 Hz, 8H, PyH, 1b), 9.20 (d, *J* = 8.0 Hz, 4H, PyH, 1b), 9.24 (d, 4H, *J* = 5.5 Hz PyH, 1b), 9.39 (d, *J* = 5.5 Hz, 8H, PyH, 1b), 9.76 (s, 4H, PyH, 1b), 10.61 (s, 8H, PyH, 1b).

**Physical data of 5a:** <sup>1</sup>H NMR (500 MHz, CDCl<sub>3</sub>, 300 K): *d* = 0.89 (t, *J* = 7.5 Hz, 3H, CH<sub>3</sub>), 1.29 (sextet, *J* = 7.5 Hz, 2H, CH<sub>2</sub>), 1.49 (quintet, *J* = 7.5 Hz, 2H, CH<sub>2</sub>), 2.48 (t, *J* = 8.0 Hz, 2H, CH<sub>2</sub>), 3.77 (s, 2H, CH<sub>2</sub>), 7.31 (d, *J* = 9.0 Hz, 2H, CH), 7.62 (d, *J* = 9.0 Hz, 2H, CH). MS (EI) *m/z*: 201 [M]<sup>+</sup>, 116 [M–C<sub>4</sub>H<sub>9</sub>CO]<sup>+</sup>, 85 [C<sub>4</sub>H<sub>9</sub>CO]<sup>+</sup>, 57 [C<sub>4</sub>H<sub>9</sub>]<sup>+</sup>.

### Photo-hydration of 4b within cage 1b.

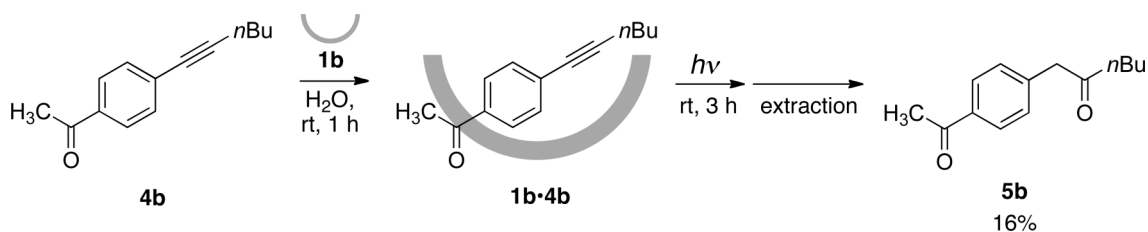

**Physical data of 1b·4b:** <sup>1</sup>H NMR (500 MHz, D<sub>2</sub>O, 300 K): *d* = 0.44 (br, 5H, CH<sub>2</sub> and CH<sub>3</sub>, 4b), 0.69 (br, 2H, CH<sub>2</sub>, 4b), 1.16 (br, 2H, CH<sub>2</sub>, 4b), 1.53 (br, 2H, CH<sub>3</sub>, 4b), 2.99–3.11 (m, 24H, CH<sub>2</sub>, 1b), 5.30 (br, 2H, CH, 4b), 5.79 (br, 2H, CH, 4b), 8.02 (t, *J* = 7.0 Hz, 8H, PyH, 1b), 8.17 (t, *J* = 7.0 Hz, 4H, PyH, 1b), 8.98 (d, *J* = 6.0 Hz, 8H, PyH, 1b), 9.24 (d, *J* = 8.0 Hz, 4H, PyH, 1b), 9.31 (d, 4H, *J* = 5.5 Hz PyH, 1b), 9.44 (d, *J* = 5.0 Hz, 8H, PyH, 1b), 9.60 (s, 4H, PyH, 1b), 10.62 (s, 8H, PyH, 1b).

**Physical data of 5b:** <sup>1</sup>H NMR (500 MHz, CDCl<sub>3</sub>, 300 K): *d* = 0.89 (t, *J* = 7.0 Hz, 3H, CH<sub>3</sub>), 1.28 (sextet, *J* = 7.5 Hz, 2H, CH<sub>2</sub>), 1.56 (quintet, *J* = 7.5 Hz, 2H, CH<sub>2</sub>), 2.47 (t, *J* = 7.5 Hz, 2H, CH<sub>2</sub>), 2.60 (s, 3H, CH<sub>3</sub>), 3.75 (s, 2H, CH<sub>2</sub>), 7.30 (d, *J* = 8.0 Hz, 2H, CH), 7.93 (d, *J* = 7.5 Hz, 2H, CH). MS (EI) *m/z*: 218 [M]<sup>+</sup>, 203 [M–CH<sub>3</sub>]<sup>+</sup>, 57 [C<sub>4</sub>H<sub>9</sub>]<sup>+</sup>.
